# Supplementary material for: An impedimetric determination of alkaline phosphatase activity based on the oxidation reaction mediated by Cu2+ bound to poly-thymine DNA
Source: RSC Adv. 2018 Mar 21;8(20):11241–6. doi: 10.1039/c7ra13642k (PMC9078965; doi:10.1039/c7ra13642k)
Supplement: RA-008-C7RA13642K-s001 [file RA-008-C7RA13642K-s001.pdf]

**Supplementary Information**

**An impedimetric determination of alkaline phosphatase activity  
based on the oxidation reaction mediated by Cu<sup>2+</sup> bound to poly-  
thymine DNA**

*Joon Young Lee,<sup>a</sup> Jun Ki Ahn,<sup>a</sup> Ki Soo Park<sup>b</sup> and Hyun Gyu Park<sup>\*a</sup>*

<sup>a</sup> Department of Chemical and Biomolecular Engineering (BK21+ program), Korea Advanced Institute of Science and Technology (KAIST), 291, Daehak-ro, Yuseong-gu, Daejeon 305-701, Republic of Korea

<sup>b</sup> Department of Biological Engineering, College of Engineering, Konkuk University, Seoul 05029, Republic of Korea

\*Corresponding author. Tel.: +82 42 350 3932; Fax: +82 42 350 3910; E-mail: [hgpark@kaist.ac.kr](mailto:hgpark@kaist.ac.kr)

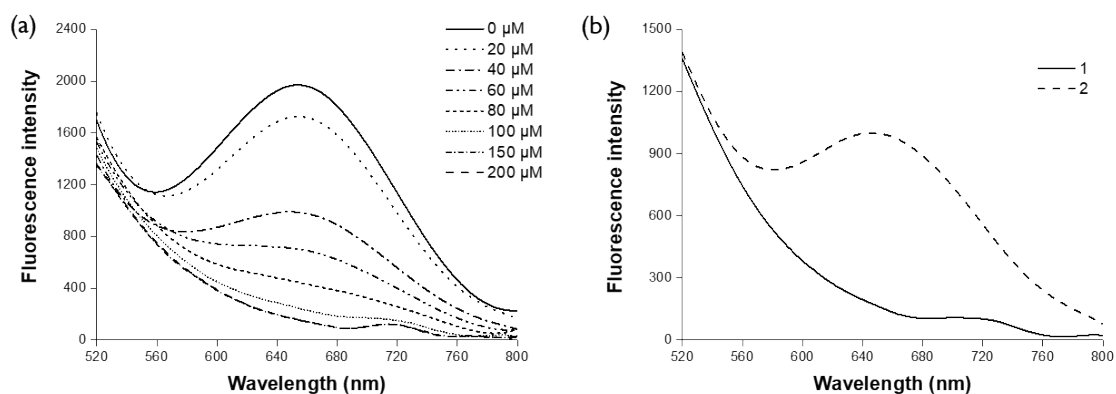

**Fig. S1** Fluorescence spectra obtained from CuNP formed by the reduction of  $\text{Cu}^{2+}$ . (a) Fluorescence spectra from CuNP formed through treating  $\text{Cu}^{2+}$  with ascorbic acid in the presence of PPI at varying concentrations. (b) Fluorescence spectra obtained from solutions containing 100  $\mu\text{M}$   $\text{Cu}^{2+}$ , 2 mM ascorbic acid, 1  $\mu\text{M}$  poly-thymine DNA probe and 100  $\mu\text{M}$  PPI (1), or 100  $\mu\text{M}$  PPI previously treated with 1 nM ALP (2).

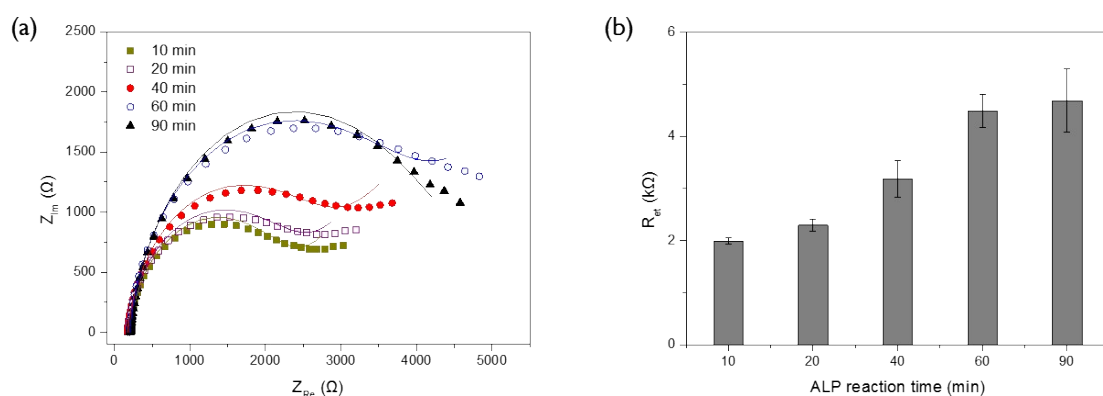

**Fig. S2** Optimization of the reaction time for ALP reaction. (a) Nyquist plots of the impedance spectra and (b) electron transfer resistance ( $R_{et}$ ) obtained from the corresponding impedance spectra at different ALP reaction times. The final concentrations of ALP, PPI,  $Cu^{2+}$ , and ascorbic acid are 1 nM, 100  $\mu$ M, 100  $\mu$ M, and 2 mM, respectively.

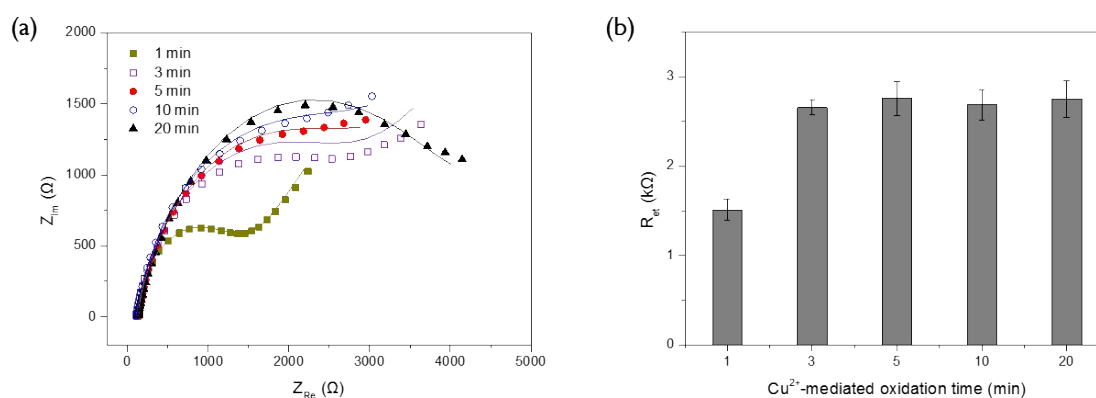

**Fig. S3** Optimization of the reaction time for  $Cu^{2+}$ -mediated oxidation of ascorbic acid on the poly-thymine DNA-modified electrode. (a) Nyquist plots of the impedance spectra and (b) electron transfer resistance ( $R_{et}$ ) obtained from the corresponding impedance spectra at different  $Cu^{2+}$ -mediated oxidation times. The final concentrations of ALP, PPI,  $Cu^{2+}$ , and ascorbic acid are 1 nM, 100  $\mu$ M, 100  $\mu$ M, and 2 mM, respectively.

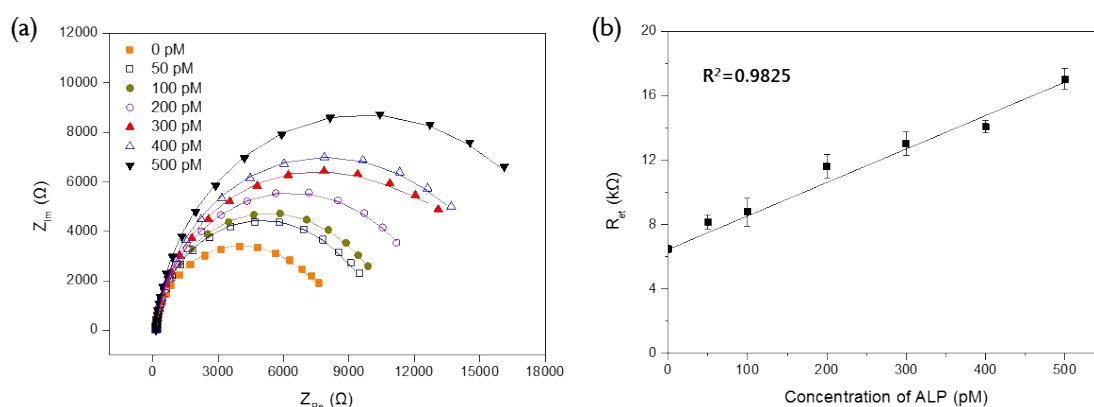

**Fig. S4** ALP assay in human serum samples. (a) Nyquist plots of the impedance spectra and (b) electron transfer resistance ( $R_{et}$ ) obtained from the corresponding impedance spectra upon  $Cu^{2+}$ -mediated oxidation in the presence of diluted human serum spiked with varying concentrations of ALP.

**Table S1** Comparison of this method with previous electrochemical methods.

| Key material/method                                 | Detection limit (U/L) | Linear range (U/L) | Limitations                                                                  | Reference             |
|-----------------------------------------------------|-----------------------|--------------------|------------------------------------------------------------------------------|-----------------------|
| Nitrophenylphosphate plastic membrane sensor        | 30                    | 30 - 3400          | - Time-consuming preparation of membrane sensor (28 hr)<br>- Low sensitivity | (Hassan et al. 2009)  |
| $\lambda$ Exonuclease-mediated signal amplification | 100                   | 1000 - 20000       | - Requirement of additional enzyme<br>- Low sensitivity                      | (Miao et al. 2011)    |
| Nanoceria particle-mediated signal amplification    | 20                    | 5000 - 640000      | - Low sensitivity                                                            | (Hayat et al. 2013)   |
| Ferrocene-derived substrate                         | 0.4                   | 1 - 250            | - Complex synthesis of organic substrate                                     | (Goggins et al. 2015) |
| Cu <sup>2+</sup> -mediated oxidation                | 7.2                   | 22 - 565           | -                                                                            | This work             |

## References

1. S. S. Hassan, H. E. Sayour and A. H. Kamel, *Anal. Chim. Acta*, 2009, **640**, 75-81.
2. P. Miao, L. Ning, X. Li, Y. Shu and G. Li, *Biosens. Bioelectron.*, 2011, **27**, 178-182.
3. A. Hayat and S. Andreescu, *Anal. Chem.*, 2013, **85**, 10028-10032.
4. S. Goggins, C. Naz, B. J. Marsh and C. G. Frost, *Chem. Commun.*, 2015, **51**, 561-564.
